## RESEARCH ARTICLE

# Glucose transporter expression and regulation following a fast in the ruby-throated hummingbird, *Archilochus colubris*

Raafay S. Ali<sup>1,2</sup>, Morag F. Dick<sup>2</sup>, Saad Muhammad<sup>1,2</sup>, Dylan Sarver<sup>3</sup>, Lily Hou<sup>2</sup>, G. William Wong<sup>3</sup> and Kenneth C. Welch Jr<sup>1,2,\*</sup>

## ABSTRACT

Hummingbirds, subsisting almost exclusively on nectar sugar, face extreme challenges to blood sugar regulation. The capacity for transmembrane sugar transport is mediated by the activity of facilitative glucose transporters (GLUTs) and their localisation to the plasma membrane (PM). In this study, we determined the relative protein abundance of GLUT1, GLUT2, GLUT3 and GLUT5 via immunoblot using custom-designed antibodies in whole-tissue homogenates and PM fractions of flight muscle, heart and liver of ruby-throated hummingbirds (*Archilochus colubris*). The GLUTs examined were detected in nearly all tissues tested. Hepatic GLUT1 was minimally present in whole-tissue homogenates and absent in PM fractions. GLUT5 was expressed in flight muscles at levels comparable to those of the liver, consistent with the hypothesised uniquely high fructose uptake and oxidation capacity of hummingbird flight muscles. To assess GLUT regulation, we fed ruby-throated hummingbirds 1 mol l<sup>-1</sup> sucrose *ad libitum* for 24 h followed by either 1 h of fasting or continued feeding until sampling. We measured relative GLUT abundance and concentration of circulating sugars. Blood fructose concentration in fasted hummingbirds declined (~5 mmol l<sup>-1</sup> to ~0.18 mmol l<sup>-1</sup>), while fructose-transporting GLUT2 and GLUT5 abundance did not change in PM fractions. Blood glucose concentrations remained elevated in fed and fasted hummingbirds (~30 mmol l<sup>-1</sup>), while glucose-transporting GLUT1 and GLUT3 in flight muscle and liver PM fractions, respectively, declined in fasted birds. Our results suggest that glucose uptake capacity is dynamically reduced in response to fasting, allowing for maintenance of elevated blood glucose levels, while fructose uptake capacity remains constitutively elevated promoting depletion of blood total fructose within the first hour of a fast.

**KEY WORDS:** GLUT, Fructose, Plasma membrane, Flight muscle, Liver

## INTRODUCTION

Hummingbirds primarily subsist on a diet of floral nectar high in sucrose, glucose and fructose (del Rio et al., 1992). They are capable of oxidising glucose, fructose or both to power their characteristic hovering behaviour (Chen and Welch, 2014). When

blood sugar concentrations are elevated, hummingbirds rely exclusively on these exogenous sugars to fuel nearly all the metabolic needs of their active cells (Welch et al., 2018). As such, they exhibit remarkable adaptations that enhance the capacity for immediate rapid uptake and metabolism and the long-term storage of these sugars (Price et al., 2015; Welch et al., 2018). As they enter circulation, a proportion of ingested sugars are incorporated into hummingbirds' fat stores through *de novo* lipogenesis by their liver (Suarez et al., 1988). When hummingbirds enter periods of hypoglycaemia, such as sleeping or fasted states, the entirety of their metabolic fuel source switches from circulating sugars to triglycerides derived from these fatty-acid stores (Eberts et al., 2019; Suarez et al., 1990). This switch is rapid, and a transition back to sugar metabolism occurs within a few minutes of sugar ingestion (Suarez and Welch, 2017). Furthermore, the switch from reliance on lipid oxidation to carbohydrate oxidation is nearly complete, such that mixed fuel use does not occur for very long in hummingbirds with access to sufficient floral nectar (Welch et al., 2018).

Hummingbird digestive physiology, much like that of other flying nectarivores such as bats, facilitates rapid sugar transport across the intestinal lumen and into circulation (Karasov, 2017; Rodriguez-Peña et al., 2016). A high cardiac output and capillary to muscle fibre ratio ensures high transport capacity of sugars to the site of active cells (Mathieu-Costello et al., 1992; Suarez, 1992). Sugars are then facilitatively imported across the plasma membrane (PM) and enter into active cells (Suarez and Welch, 2011). *In vitro* studies of hummingbird muscle cells have demonstrated that the phosphorylation capacity of cytosolic kinases for glucose appears sufficient in providing energy for sustained hovering, although this may not be true for fructose (Myrka and Welch, 2018). As both delivery to muscle cells and phosphorylation of glucose within them operate at rates near the theoretical maximum in vertebrates (Suarez et al., 1988; Suarez and Welch, 2017), it is likely that regulation at the site of import itself exerts a great deal of control over flux through the entirety of the sugar oxidation cascade. Along with delivery and phosphorylation, the sugar import step is a rate-limiting process in the paradigm outlined by Wasserman et al. (2011). It is nearly entirely dependent on the presence and distribution of active glucose transporters (GLUTs) (Wasserman, 2009). These proteins are a family of transmembrane solute transporters (Mueckler and Thorens, 2013). While expression of certain GLUT isoforms has been demonstrated in a variety of avian species (Coudert et al., 2018; Hussar et al., 2019; Sweazea and Braun, 2006), including hummingbirds (Myrka and Welch, 2018; Welch et al., 2013), the study of avian GLUT regulation has been limited to cell-based approaches (Steane et al., 1998; Wagstaff and White, 1995; Yamada et al., 1983). In this study, we further characterised GLUT isoform expression and sought to understand *in vivo* GLUT regulation in hummingbirds.

<sup>1</sup>Cell and Systems Biology, University of Toronto, 25 Harbord Street, Toronto, ON, Canada M5S 3G5. <sup>2</sup>Department of Biological Sciences, University of Toronto Scarborough Campus, 1265 Military Trail, Toronto, ON, Canada M1C 1A4. <sup>3</sup>Department of Physiology and Center for Metabolism and Obesity Research, School of Medicine, The Johns Hopkins University, Baltimore, MD 21205, USA.

\*Author for correspondence (kenneth.welchjr@utoronto.ca)

ORCID: R.S.A., 0000-0002-2415-5432; M.F.D., 0000-0002-7408-9656; G.W.W., 0000-0002-5286-6506; K.C.W., 0000-0002-3283-6510

Studies of mammalian GLUTs demonstrate that their expression in the PM is regulated by a variety of intracellular and extracellular factors, including blood sugar, insulin concentrations, exercise and stress (Egert et al., 1999; Guma et al., 1995; Yang and Holman, 1993). The expression, functional distribution and regulation of hummingbird GLUTs, however, remain relatively unknown. Studies on GLUT isoforms of the closest relatively well examined avian species, the chicken (*Gallus gallus domesticus*), are fragmented and the distribution of avian GLUT isoforms is not fully understood (Byers et al., 2018; Suarez and Welch, 2011; Sweazea and Braun, 2006). It is known that chicken GLUT1 and GLUT3 share sequence homologies of ~80% and ~70%, respectively, with human GLUTs, but other isoforms such as GLUT2 and GLUT5 only share ~65% and ~64% sequence homology [calculated via NCBI BLAST (Boratyn et al., 2012); summarised in Table S6]. It is also clear that GLUTs are regulated very differently in each class of animal (Wagstaff and White, 1995; Yamada et al., 1983). Despite this, the literature on mammalian GLUTs provides a useful foundation for understanding the affinities and ligand specificities of avian, including hummingbird, GLUTs. In mammals, GLUT3 and GLUT1 show the highest affinity for glucose;  $K_m \approx 1.5 \text{ mmol l}^{-1}$  (Thorens and Mueckler, 2010) and  $K_m \approx 3\text{--}5 \text{ mmol l}^{-1}$  (Zhao and Keating, 2007), respectively. GLUT5 transports fructose ( $K_m \approx 11\text{--}12 \text{ mmol l}^{-1}$ ; Douard and Ferraris, 2008), and is largely found in mammalian enteric and renal tissue (Douard and Ferraris, 2008), although some presence in hepatic tissue has also been noted (Godoy et al., 2006; Zhao et al., 1993). GLUT2, uniquely, shows affinity for both glucose and fructose ( $K_m \approx 17 \text{ mmol l}^{-1}$ ,  $K_m \approx 76 \text{ mmol l}^{-1}$ , respectively; Zhao and Keating, 2007). While its affinity for both sugars is relatively low compared with other isoforms, GLUT2 plays a dominant role in hepatic sugar transport (Wood and Trayhurn, 2003).

Importantly, it is only when GLUT isoforms are expressed and active in the PM that transmembrane sugar transport can occur from the blood into the active cell (Guma et al., 1995; Wasserman, 2009; Yamada et al., 1983). In mammals, GLUT4 translocation to the PM by insulin stimulation following feeding is known to recruit other GLUT isoforms to the PM as well, increasing the sugar import rate into active cells (Guma et al., 1995). Hummingbirds (Welch et al., 2013), much like chickens (Byers et al., 2018), do not express transcript or protein of the insulin-sensitive GLUT4 isoform. Chicken insulin levels do not significantly change with dietary status (Honda et al., 2012), and this is presumably also true in hummingbirds. Further, circulating insulin does not significantly increase sugar import in chicken muscles (Chen, 1945), though it may in the liver (Dupont, 2009; Zhang et al., 2013). Lastly, and unlike mammals, hummingbirds have limited intramuscular glycogen stores (Suarez et al., 1990), and therefore rely on newly imported sugars from circulation for carbohydrate oxidation (Welch et al., 2018). Despite missing critical elements of the insulin–GLUT4 pathway, fed hummingbirds utilise circulating sugars, when available, at very high rates to meet their metabolic demands (Suarez and Welch, 2017).

Previous studies have confirmed the presence of GLUT1 and GLUT5 transcript in nearly all hummingbird tissue examined (Myrka and Welch, 2018). Immunohistochemistry of hummingbird myocytes using a commercial antibody for GLUT1 have also shown GLUT1 localisation to the PM (Welch et al., 2013), although the results were not definitive. In this study, using custom-designed antibodies for the different isoforms of hummingbird GLUTs, we sought to identify the tissue-specific protein distribution and to quantify the abundance in the PM of GLUT1, GLUT2, GLUT3 and

GLUT5. We predicted GLUT1 would be detected in hummingbird flight muscle, heart and liver tissue, in accordance with its ubiquitous presence in mammalian tissue (Mueckler and Thorens, 2013), as well as its previous detection in hummingbird myocytes (Welch et al., 2013). As GLUT2 plays a stronger role in enteric (Karasov, 2017) and hepatic (Mueckler and Thorens, 2013) sugar transport, we predicted that its abundance would be limited in muscles and more predominantly found in the liver. In mammals, GLUT3 is observed in close association with GLUT1 (Simpson et al., 2008) and may function as a replacement for GLUT4 in certain muscle developmental stages (Klip et al., 1996). We expected to detect GLUT3 in tissues also expressing GLUT1. We also expected to find GLUT5 in both the liver and muscles, as hummingbird muscles are capable of supporting hovering flight on fructose-only meals (Chen and Welch, 2014). To further characterise the regulatory aspects of hummingbird GLUTs, we compared the abundance of GLUT1, GLUT2, GLUT3 and GLUT5 in the PM of fed and fasted hummingbirds. We also measured levels of circulating glucose and fructose in these birds. Based on previous measurements of hummingbird blood glucose (Beuchat and Chong, 1998), we expected to see high blood glucose concentrations ( $\sim 40 \text{ mmol l}^{-1}$ ) in the fed condition and lower levels in the fasted condition ( $\sim 15\text{--}25 \text{ mmol l}^{-1}$ ). Measurements of hummingbird blood fructose concentrations have not previously been made. However, similar to frugivorous bats (Keegan, 1977), we predicted blood fructose concentrations in fed hummingbirds to be  $\sim 5\text{--}10 \text{ mmol l}^{-1}$  and  $\sim 0 \text{ mmol l}^{-1}$  in fasted hummingbirds. Given the rapid switching between glucose or fructose oxidation and oxidation of lipid stores in fed versus fasting hummingbirds, we expected a greater abundance of PM GLUT1, PM GLUT3 and PM GLUT5 in flight muscle and liver of fasted hummingbirds. Finally, we expected little difference between GLUT2 abundance in the PM of tissue from fed and fasted hummingbirds.

## MATERIALS AND METHODS

### Animal use and ethics statement

This study was approved and performed adhering to the requirements of the University of Toronto Laboratory Animal Care Committee and the Canadian Council on Animal Care. Twelve adult male ruby-throated hummingbirds, *Archilochus colubris* (Linnaeus 1758), were captured in the early summer at the University of Toronto Scarborough (UTSC) using modified box traps and housed individually in Eurocages (Corners Ltd, Kalamazoo, MI, USA) in the UTSC vivarium under a 12 h:12 h light:dark cycle. They were provided with perches and fed on a maintenance diet of NEKTON-Nectar-Plus (Keltern, Germany) for 2–3 months until the start of the experiment.

All hummingbirds were provided with  $\sim 33\%$  sucrose solution for 24 h prior to the experiment. Birds were divided into a fed group ( $n=6$ ), which was provided with *ad libitum*  $1 \text{ mol l}^{-1}$  sucrose solution up to sampling, beginning at 10:00 h, and a fasted group ( $n=6$ ), which was deprived of any food for a 1 h duration prior to the 10:00 h sample collection. To minimize interindividual variation in activity level and energy expenditure, birds from both treatment groups were held in small glass jars, perched on wooden dowels, in which they were constrained from flying for the duration of the 1 h fast. Respirometry measurements by Chen and Welch (2014) have previously shown that this is sufficient time for the fasted hummingbirds to shift from using circulating sugars to using fats to fuel metabolism. Fed hummingbirds will continue to exclusively metabolise sugars. Hummingbirds were then anaesthetised with isoflurane inhalation and killed via decapitation. Immediately after

decapitation, blood was sampled from the carotid artery using heparinized capillary tubes and spun at 3800 *g* for 10 min at room temperature and the plasma stored at  $-80^{\circ}\text{C}$ . Flight muscle (the pectoralis and supracoracoideus muscles), heart and liver were extracted and frozen with isopentane cooled with liquid nitrogen. All tissues were stored at  $-80^{\circ}\text{C}$ .

### Circulating sugar and metabolite analysis

Plasma samples were sent to the Metabolomics Innovation Centre (TMIC) at the University of Victoria (Victoria, BC, Canada) to be analysed via service 45 (absolute quantification of central carbon metabolism metabolites and fructose: <https://www.metabolomicscentre.ca/service/45>). Quantification of glucose and fructose concentrations in plasma samples was achieved via chemical derivatization – liquid chromatography–multiple reaction monitoring/mass spectrometry (LC-MRM/MS) following a protocol outlined by Han et al. (2016). Quantification of central carbon metabolites (organic acids; lactate and pyruvate) of flight muscle was done via the protocol outlined by Han et al. (2013).

### Antibody design, production and isoform specificity

Anti-rabbit polyclonal antibodies for GLUT isoforms were designed in conjunction to minimise cross-reactivity using the services of Pacific Immunology (Ramona, CA, USA). Epitope design was accomplished using mRNA sequences for ruby-throated hummingbird GLUT isoforms 1, 2, 3 and 5 that were obtained from the hummingbird liver transcriptome (Workman et al., 2018) (Table S4). The concentration of the affinity-purified antibody samples was assessed using ELISA by Pacific Immunology (ab-GLUT1  $\sim 1.1\text{ mg ml}^{-1}$ , ab-GLUT2  $\sim 5.7\text{ mg ml}^{-1}$ , ab-GLUT3  $\sim 2.6\text{ mg ml}^{-1}$ , ab-GLUT5  $\sim 1.0\text{ mg ml}^{-1}$ ). The final experimental dilutions were determined empirically through preliminary experiments and are provided below.

### Generation of mammalian expression plasmids encoding *A. colubris* GLUT1, GLUT2, GLUT3 and GLUT5

The cDNA encoding *A. colubris* GLUT1 (NCBI accession number MT472837), GLUT2 (MT472838), GLUT3 (MT472839) and GLUT5 (MT472840) were synthesized by GenScript based on the full-length mRNA sequences derived from our previously published RNA sequencing data (Workman et al., 2018). The V5 epitope tag (encoding the peptide GKPIPPLLGLDST) was inserted at the 3' end of each cDNA immediately after the last coding amino acid. All epitope-tagged cDNA sequences were cloned into the EcoRI restriction site of the mammalian expression vector pCDNA3.1 (+) (Invitrogen, Carlsbad, CA, USA). All expression plasmids were verified by DNA sequencing.

### Specificity immunoblots

SDS-PAGE was run on cell lysates of HEK293T cells transiently transfected, using lipofectamine 2000 (Invitrogen), with hummingbird GLUT1, GLUT2, GLUT3 or GLUT5 (acGLUT1, acGLUT2, acGLUT3 or acGLUT5) expression vectors, all containing a V5 tag. Cell lysates produced using RIPA buffer (50  $\text{mmol l}^{-1}$  Tris-HCl, pH 7.4; 150  $\text{mmol l}^{-1}$  NaCl; 1  $\text{mmol l}^{-1}$  EDTA; 1% Triton X100; 0.25% deoxycholate) supplemented with protease and a phosphatase inhibitor cocktail (MilliporeSigma, Burlington, MA, USA; and Roche, Basel, Switzerland, respectively). Each lysate was confirmed to express the appropriate recombinant protein at the expected size using an anti-V5 antibody produced in rabbit (Sigma V8137). Isoform specificity was tested via immunoblotting all cell lysates (empty

vector control, acGLUT1, acGLUT2, acGLUT3 and acGLUT5) with each novel acGLUT antibody and observing GLUT protein signal overlap; none was observed. Briefly, each immunoblot lane represents a cell lysate produced from an entire well of a 6-well cell culture dish (Thermo Scientific, Nunc). Lysates were diluted with SDS loading dye (final concentration: 50  $\text{mmol l}^{-1}$  Tris-HCl, pH 7.4, 2% SDS, 6% glycerol, 1% 2-ME and 0.01% Bromophenol Blue) and not boiled. An equal volume of each lysate was added to the designated lane on a 12% polyacrylamide gel (BioRad, Hercules, CA, USA) and separated by electrophoresis. The BioRad Trans-Blot Turbo semidry system was used to transfer protein onto PVDF membranes. Blots were blocked in 5% non-fat milk in phosphate-buffered saline with Tween 20 (PBST) and exposed to primary antibodies overnight at  $4^{\circ}\text{C}$ . After washing, blots were exposed to HRP-conjugated secondary antibody (Anti-Rabbit IgG, 7074S, Cell Signaling Technology, Danvers, MA, USA) for 1 h at room temperature and developed in ECL (Amersham ECL Select; GE Healthcare, Chicago, IL, USA). Bands were visualized with the MultiImage III FluorChem Q (Alpha Innotech, San Leandro, CA, USA). Primary antibodies were diluted 1:1000 in PBST+0.02% sodium azide. The secondary antibody was diluted 1:10,000 in PBST+0.02% sodium azide.

### Tissue sample preparation

Each tissue sample underwent either a plasma membrane fractionation protocol, established by Yamamoto et al. (2016) and slightly modified by replacing NP-40 (nonidet P-40) with Triton X-100 (Sigma-Aldrich, St Louis, MO, USA) to obtain only PM proteins, or a radioimmunoprecipitation assay buffer (RIPA) homogenisation (part of the same protocol) to obtain all proteins contained in a whole cell. PM fractionation used different detergent concentrations (0.1%, 1%, 2%) in the homogenisation buffers to solubilise proteins and create protein–detergent complexes depending on whether they are in the hydrophilic (cytosolic) domain or the hydrophobic (PM) domain.

### Buffer composition

Buffer A01 (0.5  $\text{mol l}^{-1}$  DTT, ddH<sub>2</sub>O and 0.1% v/v Triton X-100), A1 (0.5  $\text{mol l}^{-1}$  DTT, ddH<sub>2</sub>O and 1% v/v Triton X-100) and 2 $\times$  RIPA [20  $\text{mmol l}^{-1}$  Tris-HCl, pH 8.0, 300  $\text{mmol l}^{-1}$  NaCl, 2% v/v Triton X-100, 1% w/v sodium deoxycholate, 0.2% w/v sodium dodecyl sulfate (SDS), 1  $\text{mmol l}^{-1}$  DTT] were prepared. All reagents were cooled to  $4^{\circ}\text{C}$  before homogenisation and included Sigma P8340 protease inhibitor cocktail.

### Homogenisation and plasma membrane fractionation

A 20 mg piece of flight muscle, liver or heart was cut on a cold aluminium block and immediately placed in an ice-bath. The tissue was minced in buffer A01 with scissors and homogenised using a VWR (Mississauga, ON, Canada) handheld pestle homogenizer (BELAF65000000). The homogenate was passed through a 21 gauge needle 3 times to liberate nuclear and intracellular proteins. An aliquot of the homogenate was left on ice for 60 min in 2 $\times$  RIPA buffer. This whole-tissue RIPA fraction was then centrifuged at 12,000 *g* for 20 min at  $4^{\circ}\text{C}$ , allowing proteins to be solubilised. The supernatant was collected and stored at  $-80^{\circ}\text{C}$  as the whole-tissue homogenate. The remainder of the tissue homogenate was centrifuged at 200 *g* for 1 min at  $4^{\circ}\text{C}$ . The upper phase was set aside, and 90  $\mu\text{l}$  of buffer A01 was added to the lower phase, which was homogenised for 10 s. The lower phase was centrifuged at 200 *g* for 1 min and added to the tube containing the upper phase. The combined phases were centrifuged at 750 *g* for 10 min. The



supernatant consisting of non-PM proteins was removed. The remainder of the protein–detergent complex pellet was resuspended with buffer A1 and kept on ice for 60 min. After centrifugation at 12,000 *g* for 20 min, the supernatant containing only PM-associated proteins was collected as the PM fraction.

### SDS-PAGE

Gels (10% resolving, 4% stacking) were cast using a 15-well comb and AA-Hoefer Gel Caster apparatus [10% resolving gel: 33% 30%-acrylamide/bisacrylamide (37.1:1), 33% separating gel buffer (1.5 mol l<sup>-1</sup> Tris Cl, 0.4% SDS), 55% ddH<sub>2</sub>O, 0.65% ammonium persulfate (APS), 5.5% TEMED; 4% stacking gel: 13.4% 30%-acrylamide/bisacrylamide (37.1:1), 9.3% stacking gel buffer (0.5 mol l<sup>-1</sup> Tris Cl, 0.4% SDS), 33% ddH<sub>2</sub>O, 0.06% APS, 3.3% TEMED]. Samples were incubated in a 1:1 (w/v) ratio of 2× sample buffer (0.2 mol l<sup>-1</sup> DTT, BioRad Laemmli Sample Buffer #1610737) at room temperature for 20 min. The AA-Hoefer SE600 Vertical Gel Electrophoresis apparatus was set up with 6 l running buffer (10% BioRad 10× Tris/Glycine/SDS #1610732, 90% ddH<sub>2</sub>O). The gel was run at 90 V for 20 min and 110 V for another 75 min with power supplied from an AA-Hoefer PS200HC Power Unit.

### Electroblotting and immunoblotting

The SDS-PAGE gel was transferred to 0.45 μm pore nitrocellulose (NC) membrane (GE Life Sciences #10600003 Protran Premium 0.45 NC) using an AA-Hoefer TE22 Mighty Small Transfer unit at 110 V for 90 min with water cooling and immersion in an icebath. The transfer buffer consisted of 192 mmol l<sup>-1</sup> glycine, 24.8 mmol l<sup>-1</sup> Tris, 0.00031% SDS, 20% methanol. To normalise, a total-protein stain, SYPRO Ruby Red Blot (BioRad #1703127), was used and imaged on a BioRad PharosFX Molecular Imager (#1709460) using a 532 nm laser and captured with a 600–630 nm bandpass filter. The membranes were incubated with primary antibody overnight at the following dilutions in PBST: ab-GLUT1 1:250, ab-GLUT2 1:2000, ab-GLUT3 1:2000, ab-GLUT5 1:500. Membranes were then incubated with anti-rabbit horseradish peroxidase (HRP)-conjugated secondary antibody (Cell Signalling Technology #7074) at 1:1000 dilution with PBST. Finally, Pierce Electrochemiluminescent Reagent (Pierce 32106) was used to fluoresce conjugates, which were imaged using a BioRad Chemidock XRS+ Gel Imager.

### PM fraction purity

To validate the separation of PM proteins from cytosolic proteins, commercially available control antibodies were used that were validated by the manufacturer for cross-reactivity in chickens. Known PM-residing and cytosol-residing proteins were targeted and their abundance was used to assess the degree of PM fractionation in flight muscle, liver and heart samples. The membranes were incubated at 1:1000 dilution for 90 min at room temperature and included antibodies for (1) E-cadherin (Cell Signalling Tech. 24E10), (2) Na<sup>+</sup>/K<sup>+</sup>-ATPase (Cell Signalling Tech. 3010), (3) glyceraldehyde-3-phosphate dehydrogenase (GAPDH) (Cell Signalling Tech. 14C10) and (4) fatty acid translocase (FAT) (Abgent AP2883c) (summarised in Table S2).

### Western blot band normalisation

GLUT protein molecular weights were predicted using ExpASY (Gasteiger et al., 2005). Protein quantification was done with a Pierce 660 nm assay. Five micrograms of sample protein was loaded into each well of the polyacrylamide gel, and was compared with wells containing visible protein ladder (Sigma 26616). The

antibody staining intensity of each Western blot sample was normalised to its corresponding total-protein stain intensity using BioRad ImageLab software. Background subtraction was applied to the total protein stain in a lane-wise fashion, while no background subtraction was applied to the antibody staining intensity. Fluorescence intensity for the total-protein stain was measured using 30% of the lane width as per the recommendation of Gassmann et al. (2009). The antibody stain was measured using a fixed lane width comprising the entire lane. Normalised molecular weights were recorded.

### Statistical analysis

A Student's *t*-test was performed for the sugar and metabolite concentrations between fed and fasted hummingbirds. We evaluated variation in isoform intensity data for each GLUT by creating linear mixed-effects models (LMMs) in R statistical language (version 3.6.1, r-project.org) using the lme4 package (Bates et al., 2015) for GLUT isoform fluorescence intensity data. We compared relative GLUT1, GLUT2, GLUT3 and GLUT5 abundance among tissues, and between fed and fasted individuals using a fully factorial design. Assumptions of residual normality were checked through visual inspection of the quantile–quantile (Q–Q) plot, a frequency histogram, and the Shapiro–Wilk normality test. When necessary, model parameters were transformed by a chosen function (the details of which are presented in Results, below) resulting in the greatest homoscedasticity. The data were fitted using the formula Fluorescence intensity ~ Treatment × Tissue + Blot, which outperformed more simplified models, as indicated by AICc (Akaike information criterion corrected for small sample sizes), the details of which are presented in Table S5. To account for the contribution of blot-to-blot variation, individual blots were treated as random effects (represented as Blot in the formula). Analysis of variance (ANOVA) was performed on the model parameters to determine the significance of any interactions. *Post hoc* analysis was performed using the emmeans package (<https://CRAN.R-project.org/package=emmeans>) within R software to determine group means and standard error. Pairwise comparison was performed to determine statistical significance of groups using the Tukey HSD method with the contrast function from the emmeans package. All data are presented as means ± s.e.m.

## RESULTS

### Circulating sugars and metabolites of fed and fasted hummingbirds

Overall, plasma samples demonstrated a significant difference for only blood fructose concentration ( $t_{9,9} = -17.2$ ,  $P = 0.001$ ), which was higher in fed hummingbirds ( $5.34 \pm 0.2$  mmol l<sup>-1</sup>) than in fasted hummingbirds ( $0.21 \pm 0.1$  mmol l<sup>-1</sup>). Glucose concentration in fed hummingbirds ( $30.04 \pm 2.0$  mmol l<sup>-1</sup>) remained similarly elevated in fasted hummingbirds ( $29.67 \pm 1.5$  mmol l<sup>-1</sup>). Flight muscle homogenates indicated that lactate concentration in fed individuals ( $4.31 \pm 1.3$  mmol l<sup>-1</sup>) was slightly lower than in fasted birds ( $6.35 \pm 0.9$  mmol l<sup>-1</sup>), although this was not a significant difference. Likewise, pyruvate concentration in fed hummingbirds ( $0.21 \pm 0.03$  mmol l<sup>-1</sup>) remained elevated in fasted hummingbirds ( $0.22 \pm 0.01$  mmol l<sup>-1</sup>). These results are summarised in Fig. 1.

### Antibody specificity and GLUT detection

Antibodies showed a high degree of specificity for their isoform in immunoblots of HEK293 cell lysates (Table S3). In hummingbird tissue, GLUT proteins were identified by band molecular weights, and were, with one exception, present in both PM fractions and whole-tissue homogenates following PM fractionation (Table S1).

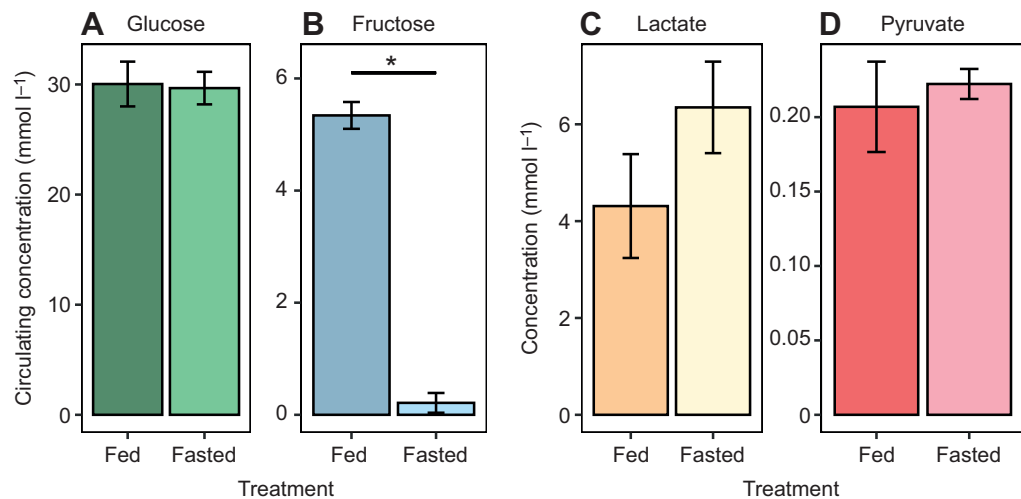

**Fig. 1. Mean concentration of circulating sugars and metabolites.** (A) Glucose and (B) fructose concentrations from plasma samples and (C) lactate and (D) pyruvate concentrations from flight muscle homogenates of fed ( $n=6$ ) and fasted ( $n=5$ ) male hummingbirds. Data are presented as means $\pm$ s.e.m. (\* $P=0.001$ ).

GLUT1, GLUT2, GLUT3 and GLUT5 were detected in whole-tissue homogenates of flight muscle and heart of ruby-throated hummingbirds, as well as in PM fractions. GLUT1 in liver whole-tissue homogenates was minimally detected and was not detected at all in liver PM fractions. GLUT1, GLUT2 and GLUT5 were detected at approximately their expected molecular weights in all tissues. GLUT3 was detected at a size slightly larger than predicted.

### Relative GLUT abundance

#### GLUT1

Flight muscle whole-tissue homogenates, regardless of treatment, had a similar GLUT1 abundance to heart whole-tissue homogenates. However, flight muscle whole-tissue homogenates had significantly greater GLUT1 abundance compared with liver whole-tissue homogenates in both fed (flight muscle/liver ratio:  $4.75\pm 1.27$ ,  $t_{3,02}=4.54$ ,  $P=0.040$ ) and fasted (flight muscle/liver ratio:  $5.76\pm 1.54$ ,  $t_{3,02}=4.28$ ,  $P=0.046$ ) individuals. These results are summarised in Table 3 and Fig. 2A. Fasting treatment had a significant effect on GLUT1 abundance in whole-tissue homogenates ( $F_{1,13}=7.99$ ,  $P=0.014$ ). *Post hoc* analysis, however, revealed that only flight muscle whole-tissue GLUT1 abundance was significantly lower in fasted hummingbirds (fasted/fed ratio:  $0.73\pm 0.09$ ;  $t_{13}=2.63$ ,  $P=0.021$ ) (Table 1; Fig. S1).

With respect to PM fractions, we observed a significant effect of tissue ( $F_{1,3.78}=24$ ,  $P=0.009$ ) and the interaction of tissue and treatment ( $F_{1,13.02}=17.03$ ,  $P=0.012$ ). Multiple comparisons revealed that the relative abundance of PM GLUT1 was  $>2$ -fold higher in flight muscle PM fractions compared with heart PM fractions only in the fed condition (fed flight muscle/fed heart ratio:  $4.87\pm 1.31$ ,  $t_{4,68}=5.89$ ,  $P=0.009$ ). These results are summarised in Table 4 and Fig. 2B. Additionally, PM GLUT1 abundance was significantly lower in flight muscle PM fractions of fasted hummingbirds (fasted/fed ratio:  $0.61\pm 0.06$ ,  $t_{13}=4.66$ ,  $P=0.002$ ) (Table 2; Fig. S2).

#### GLUT2

No significant difference was observed among whole-tissue homogenates in their relative GLUT2 abundance regardless of treatment (Table 3). However, a significant effect of fasting treatment was observed among whole-tissue homogenates ( $F_{1,11}=6.22$ ,  $P=0.029$ ). Multiple comparisons revealed that only flight muscle whole-tissue homogenates had a significantly lower relative GLUT2 abundance in fasted hummingbirds (fasted/fed ratio:  $0.54\pm 0.08$ ,  $t_{14.5}=2.63$ ,  $P=0.019$ ). Heart whole-tissue homogenates and liver whole-tissue homogenates did not show a significant difference in GLUT2 abundance with fasting treatment (Table 1 and Fig. 3A).

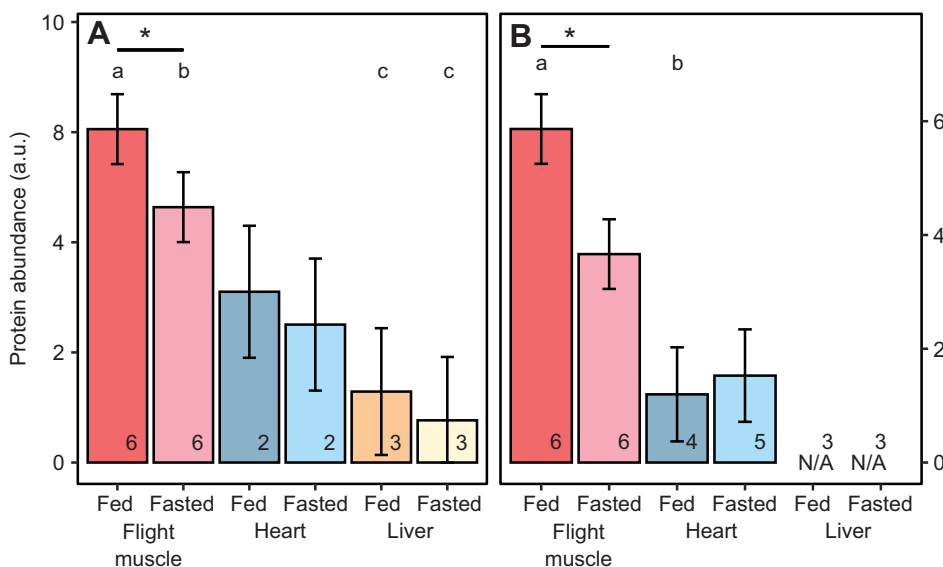

**Fig. 2. Relative protein abundance of GLUT1 in hummingbird flight muscle, heart and liver tissue.** Data represent mean $\pm$ s.e.m. arbitrary units (a.u.) of intensity based on analyses of normalised immunoblots. *Ad libitum* fed and 1 h fasted hummingbird GLUT1 abundance was measured in (A) whole-tissue homogenates and (B) plasma membrane (PM) fraction samples. Asterisks indicate a significant difference ( $P<0.05$ ) in GLUT1 between fed and fasted conditions within that tissue (summarised in Tables 1 and 2; Figs S1 and S2). Letters (a,b,c) over individual bars represent a significant difference ( $P<0.05$ ) of GLUT1 abundance between the specified tissue under the treatment condition (summarised in Tables 3 and 4). Sample sizes are given in the bars for each tissue and treatment.

**Table 1. Relative whole-tissue abundance of GLUT1, GLUT2, GLUT3 and GLUT5 in flight muscle, heart and liver of fed and fasted hummingbirds**

| Whole-tissue homogenate | MW (kDa) | Fasted/fed ratio                                |                                                |                                                  |
|-------------------------|----------|-------------------------------------------------|------------------------------------------------|--------------------------------------------------|
|                         |          | Flight muscle                                   | Heart                                          | Liver                                            |
| GLUT1                   | 47.0     | 0.73±0.09<br><i>P</i> =0.010*<br><i>n</i> =6, 6 | 0.81±0.16<br><i>P</i> =0.370<br><i>n</i> =2, 2 | 0.60±0.10<br><i>P</i> =0.126<br><i>n</i> =3, 3   |
| GLUT2                   | 43.5     | 0.54±0.08<br><i>P</i> =0.019*<br><i>n</i> =4, 4 | 0.75±0.16<br><i>P</i> =0.134<br><i>n</i> =2, 2 | 0.96±0.17<br><i>P</i> =0.786<br><i>n</i> =3, 3   |
| GLUT3                   | 72.4     | 0.68±0.09<br><i>P</i> =0.015*<br><i>n</i> =4, 4 | 0.82±0.16<br><i>P</i> =0.626<br><i>n</i> =2, 2 | 0.58±0.09<br><i>P</i> =0.0001*<br><i>n</i> =3, 3 |
| GLUT5                   | 55.3     | 1.11±0.27<br><i>P</i> =0.350<br><i>n</i> =4, 4  | 0.82±0.36<br><i>P</i> =0.987<br><i>n</i> =2, 2 | 1.28±0.36<br><i>P</i> =0.554<br><i>n</i> =3, 3   |

Data are presented here for the whole-tissue homogenates of hummingbird tissue. Fasted/fed ratios reflect the relative variation in GLUT protein abundance with fasting treatment. Observed molecular weights (MW) are reported. Sample sizes are given for the number of (1) fed hummingbirds and (2) fasted hummingbirds. Asterisks indicate significance ( $P<0.05$ ). Representative immunoblots are shown in Fig. S1.

PM fractions did not show any significant difference among tissues, treatment, or the interaction of tissue and treatment for GLUT2 relative abundance (Tables 2, 4, and Fig. 3B).

### GLUT3

Relative GLUT3 abundance among whole-tissue homogenates was similar regardless of treatment with one exception: liver whole-tissue homogenates had significantly greater GLUT3 abundance compared with heart in fed individuals (fed liver/fed heart ratio:  $2.46\pm 0.46$ ,  $t_{3,5}=5.83$ ,  $P=0.014$ ) (Table 3 and Fig. 4B). The fasting treatment significantly affected the whole-tissue relative abundance of GLUT3 ( $F_{1,11}=17.08$ ,  $P=0.002$ ). *Post hoc* analysis revealed that both flight muscle whole-tissue homogenates (fasted/fed ratio:  $0.68\pm 0.09$ ,  $t_{24,8}=2.61$ ,  $P=0.015$ ) and liver whole-tissue homogenates (fasted/fed ratio:  $0.58\pm 0.09$ ,  $t_{24,8}=4.58$ ,  $P=0.0001$ ) had significantly less GLUT3 in fasted individuals. No significant difference was observed in the GLUT3 relative abundance of heart whole-tissue homogenates (Table 1 and Fig. 4A).

**Table 2. Relative PM abundance of GLUT1, GLUT2, GLUT3 and GLUT5 in flight muscle, heart, and liver of fed and fasted hummingbirds**

| Plasma membrane fraction | MW (kDa) | Fasted/fed ratio                                |                                                |                                                 |
|--------------------------|----------|-------------------------------------------------|------------------------------------------------|-------------------------------------------------|
|                          |          | Flight muscle                                   | Heart                                          | Liver                                           |
| GLUT1                    | 47.0     | 0.61±0.06<br><i>P</i> =0.002*<br><i>n</i> =6, 6 | 1.20±0.15<br><i>P</i> =0.500<br><i>n</i> =4, 5 | N/A N/A N/A                                     |
| GLUT2                    | 43.5     | 0.81±0.12<br><i>P</i> =0.300<br><i>n</i> =4, 4  | 1.06±0.14<br><i>P</i> =0.584<br><i>n</i> =5, 5 | 0.96±0.16<br><i>P</i> =0.792<br><i>n</i> =3, 3  |
| GLUT3                    | 72.4     | 0.90±0.14<br><i>P</i> =0.903<br><i>n</i> =4, 4  | 0.99±0.14<br><i>P</i> =1.000<br><i>n</i> =5, 5 | 0.58±0.10<br><i>P</i> =0.004*<br><i>n</i> =3, 3 |
| GLUT5                    | 55.3     | 0.17±0.30<br><i>P</i> =0.308<br><i>n</i> =4, 4  | 1.13±0.26<br><i>P</i> =0.864<br><i>n</i> =5, 5 | 0.89±0.27<br><i>P</i> =0.754<br><i>n</i> =3, 3  |

Data are presented here for hummingbird tissue samples that underwent plasma membrane fractionation; only PM-residing GLUTs are presented. Fasted/fed ratios reflect the relative variation in GLUT protein abundance with fasting treatment. Observed molecular weights (MW) are reported. Sample sizes are given for the number of (1) fed hummingbirds and (2) fasted hummingbirds. Asterisks indicate significance ( $P<0.05$ ). Representative immunoblots are shown in Fig. S2.

In PM fractions, a significant effect of the fasting treatment was observed on the relative GLUT3 abundance ( $F_{1,16}=13.13$ ,  $P=0.002$ ). Through *post hoc* analysis, we observed that GLUT3 relative abundance was significantly lower only in liver PM fractions of fasted hummingbirds (fasted/fed ratio:  $0.58\pm 0.14$ ,  $t_{16}=4.54$ ,  $P=0.004$ ) (Table 2). No significant difference was observed among tissues; however, the interaction of tissue and treatment was significant ( $F_{2,16}=6.46$ ,  $P=0.009$ ) (Table 4).

### GLUT5

Among whole-tissue homogenates, no significant effect of tissue or treatment, or their interaction, was observed for the relative abundance of GLUT5. Regardless of treatment, GLUT5 relative abundance did not differ significantly between whole-tissue homogenates (Tables 1, 3, Fig. 5A).

Within PM fractions, GLUT5 did not show any significant effect with tissue, treatment or their interaction. No significant effect was observed in the PM fraction of any tissue with fasting treatment (Table 2, Fig. 5B).

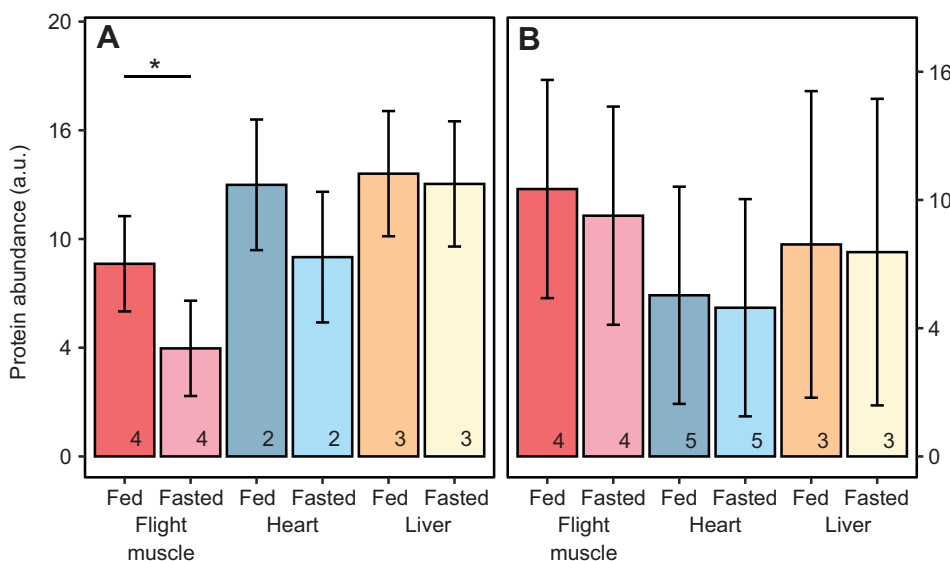

**Fig. 3. Relative protein abundance of GLUT2 in hummingbird flight muscle, heart and liver tissue.** Data represent mean±s.e.m. arbitrary units (a.u.) of intensity based on analyses of normalised immunoblots. *Ad libitum* fed and 1 h fasted hummingbird GLUT2 abundance was measured in (A) whole-tissue homogenates and (B) PM fraction samples. Asterisks indicate a significant difference ( $P<0.05$ ) in GLUT2 between fed and fasted conditions within that tissue (summarised in Tables 1 and 2; Figs S1 and S2). Differences in GLUT2 abundance between tissues within the treatment condition are summarised in Tables 3 and 4). Sample sizes are given in the bars for each tissue and treatment.

**Table 3. Relative abundance of GLUT1, GLUT2, GLUT3 and GLUT5 among whole-tissue homogenates compared pair-wise between flight muscle, heart and liver of fed and fasted hummingbirds**

| Whole-tissue homogenate | GLUT isoform | Fed                |         |                    | Fasted                |         |                    |
|-------------------------|--------------|--------------------|---------|--------------------|-----------------------|---------|--------------------|
|                         |              | Relative fed ratio | P-value | Tissue sample size | Relative fasted ratio | P-value | Tissue sample size |
| Flight muscle/heart     | GLUT1        | 1.95±0.54          | 0.082   | 6, 2               | 1.76±0.49             | 0.120   | 6, 2               |
|                         | GLUT2        | 0.70±0.35          | 0.486   | 4, 2               | 0.37±0.18             | 0.399   | 4, 2               |
|                         | GLUT3        | 1.59±0.31          | 0.175   | 4, 2               | 1.32±0.26             | 0.712   | 4, 2               |
|                         | GLUT5        | 1.82±1.37          | 0.911   | 4, 2               | 2.45±1.97             | 0.887   | 4, 2               |
| Flight muscle/liver     | GLUT1        | 4.75±1.27          | 0.040*  | 6, 3               | 5.76±1.54             | 0.046*  | 6, 3               |
|                         | GLUT2        | 0.65±0.32          | 0.386   | 4, 3               | 0.37±0.12             | 0.068   | 4, 3               |
|                         | GLUT3        | 0.65±0.11          | 0.086   | 4, 3               | 0.75±0.13             | 0.429   | 4, 3               |
|                         | GLUT5        | 0.59±0.53          | 0.985   | 4, 3               | 0.52±0.46             | 0.816   | 4, 3               |
| Heart/liver             | GLUT1        | 2.44±0.83          | 0.147   | 2, 3               | 3.28±1.11             | 0.075   | 2, 3               |
|                         | GLUT2        | 0.93±0.52          | 0.992   | 2, 3               | 0.73±0.41             | 0.699   | 2, 3               |
|                         | GLUT3        | 0.41±0.08          | 0.014*  | 2, 3               | 0.57±0.11             | 0.185   | 2, 3               |
|                         | GLUT5        | 0.33±0.29          | 0.697   | 2, 3               | 0.21±0.20             | 0.350   | 2, 3               |

Data represent the relative whole-tissue GLUT abundance. Asterisks indicate significance ( $P < 0.05$ ).

Regardless of treatment, no significant difference was observed in the relative PM GLUT5 abundance among tissues (Table 4).

## DISCUSSION

Following a 1 h treatment period, hummingbirds that were fasted ( $n=5$ ) had significantly lower blood fructose concentration ( $\sim 0$  mmol l<sup>-1</sup>) than those that continued to feed ( $\sim 5$  mmol l<sup>-1</sup>) ( $n=6$ ) (Fig. 1). As this is the first report of blood fructose concentrations in hummingbirds, it is useful to compare our results against available data from other vertebrates that specialise on sugar-rich food sources. In frugivorous bats, such as the Egyptian fruit bat (*Rousettus aegyptiacus*), blood fructose concentrations rapidly rose from near-zero to  $\sim 11$  mmol l<sup>-1</sup> following a fructose-only meal (Keegan, 1977). Blood fructose concentration of rats from the same study, representing non-sugar specialists, rose from zero to only  $\sim 0.5$  mmol l<sup>-1</sup>, taking approximately 6 times longer than the bats to reach this peak (Keegan, 1977). Egyptian fruit bats, much like hummingbirds, have also been shown to rapidly incorporate fructose into their pool of metabolisable substrates (Keegan, 1977). Similarly, in the nectarivorous Pallas's long-tongued bat (*Glossophaga soricina*), the fraction of expired CO<sub>2</sub> supported by labelled carbons ( $f_{\text{exo}}$ ) from a fructose meal took  $\sim 9$  min to reach 50% (Voigt and Speakman, 2007) while it took ruby-throated hummingbirds  $\sim 14$  min (Chen and Welch, 2014). In this study, we also observed relatively high blood fructose

concentrations in fed hummingbirds followed by presumably rapid depletion to near-zero within an hour of fasting (Fig. 1). We further observed a slightly higher lactate concentration in fasted hummingbirds, although not significantly so (Fig. 1), suggesting elevated fructolytic pathway activity (Dekker et al., 2010). These results indicate a rapid depletion of circulating fructose levels and may imply the rapid incorporation of recently ingested fructose into the pool of metabolizable substrates in hummingbirds entering a fast.

In contrast, circulating concentrations of glucose were, as expected, high in fed hummingbirds ( $30.04 \pm 2.03$  mmol l<sup>-1</sup>). However, they remained elevated in fasted hummingbirds ( $29.67 \pm 1.25$  mmol l<sup>-1</sup>). This is slightly different from our predictions based on previous measurements by Beuchat and Chong (1998), who observed a range of lower blood glucose concentrations ( $19$ – $29$  mmol l<sup>-1</sup>) in Anna's hummingbirds (*Calypte anna*) and Costa's hummingbirds (*Calypte costae*) after 1 h of fasting. This discrepancy may partially be explained by differences in ingestion rates of sugars. McWhorter and Martínez del Río (2000) demonstrated that sugar ingestion rate in broad-tailed hummingbirds (*Selasphorus platycercus*) is negatively correlated with the concentration of sugar found in a meal. While Beuchat and Chong (1998) provided their hummingbirds with  $\sim 25\%$  sucrose solution, ours was closer to  $\sim 33\%$  sucrose. Furthermore, Beuchat et al. (1979) have shown variation in intestinal sugar uptake that is related to different energy management

**Table 4. Relative abundance of GLUT1, GLUT2, GLUT3 and GLUT5 among plasma membrane fractions of flight muscle, heart and liver of fed and fasted hummingbirds**

| PM fraction         | GLUT isoform | Fed                      |         |                    | Fasted                   |         |                    |
|---------------------|--------------|--------------------------|---------|--------------------|--------------------------|---------|--------------------|
|                     |              | Relative fed ratio       | P-value | Tissue sample size | Relative fasted ratio    | P-value | Tissue sample size |
| Flight muscle/heart | GLUT1        | 4.87±1.30                | 0.009*  | 6, 4               | 2.48±0.66                | 0.075   | 6, 5               |
|                     | GLUT2        | 2.31±2.20                | 0.782   | 4, 5               | 1.77±1.67                | 0.835   | 4, 5               |
|                     | GLUT3        | 1.68±0.79                | 0.814   | 4, 5               | 1.53±0.71                | 0.950   | 4, 5               |
|                     | GLUT5        | 1.84±1.18                | 0.451   | 4, 5               | 1.96±1.24                | 0.318   | 4, 5               |
| Flight muscle/liver | GLUT1        | Not detected in liver PM |         |                    | Not detected in liver PM |         |                    |
|                     | GLUT2        | 1.19±1.37                | 0.954   | 4, 3               | 1.00±1.16                | 0.980   | 4, 3               |
|                     | GLUT3        | 0.48±0.27                | 0.396   | 4, 3               | 0.74±0.42                | 0.958   | 4, 3               |
|                     | GLUT5        | 0.61±0.47                | 0.976   | 4, 3               | 0.39±0.30                | 0.747   | 4, 3               |
| Heart/liver         | GLUT1        | Not detected in liver PM |         |                    | Not detected in liver PM |         |                    |
|                     | GLUT2        | 0.51±0.59                | 0.961   | 5, 3               | 0.57±0.65                | 0.954   | 5, 3               |
|                     | GLUT3        | 0.28±0.16                | 0.225   | 5, 3               | 0.48±0.27                | 0.730   | 5, 3               |
|                     | GLUT5        | 0.33±0.25                | 0.643   | 5, 3               | 0.20±0.15                | 0.747   | 5, 3               |

Values represent the relative abundance of GLUT proteins from isolated plasma membrane (PM) samples (fractionation efficiency approximately  $92.1 \pm 0.5\%$ ; see Table S2). Asterisks indicate significance ( $P < 0.05$ ).



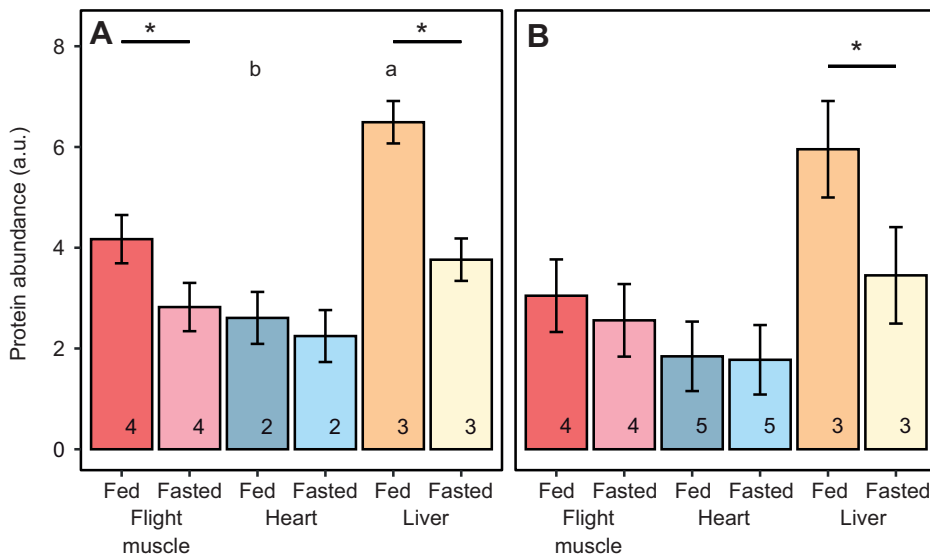

**Fig. 4. Relative protein abundance of GLUT3 in hummingbird flight muscle, heart and liver tissue.** Data represent mean  $\pm$  s.e.m. arbitrary units (a.u.) of intensity based on analyses of normalised immunoblots. *Ad libitum* fed and 1 h fasted hummingbird GLUT3 abundance was measured in (A) whole-tissue homogenates and (B) PM fraction samples. Asterisks indicate a significant difference ( $P < 0.05$ ) in GLUT3 between fed and fasted conditions within that tissue (summarised in Tables 1 and 2; Figs S1 and S2). Letters (a,b) over individual bars represent a significant difference ( $P < 0.05$ ) of GLUT3 abundance between the specified tissue under the treatment condition (summarised in Tables 3 and 4). Sample sizes are given in the bars for each tissue and treatment.

strategies employed by specific hummingbird species (as well as other nectarivores). Thus, it is possible that the relatively smaller ruby-throated hummingbird used in this study (~20% smaller than Anna's and Costa's hummingbirds), along with the slightly higher sugar concentration provided, resulted in a slightly extended duration of elevated blood glucose concentration.

The relatively rapid depletion of circulating fructose compared with circulating glucose in ruby-throated hummingbirds is noteworthy. While hummingbirds are capable of directly metabolising fructose alone to power hovering flight (Chen and Welch, 2014), it may be that fructose is utilised first in order to reserve glucose for specific metabolic needs when both are present. Organs such as the brain are exceptionally demanding of glucose in *Gallus gallus* chicks (Tokushima et al., 2005), and probably in other birds as well. This demand may be exacerbated in hummingbirds as their brain size is 2.5 times larger (relative to body mass) compared with that of galliform birds (Rehkämper et al., 1991). Lipogenic pathways of the hummingbird liver also show a preference for glucose over fructose (Dick et al., 2019). Finally, hummingbird flight muscle myofibrils' maximal capacity for monosaccharide phosphorylation is twice as high for glucose compared with fructose

in tissue homogenates *in vitro* (Myrka and Welch, 2018). As the hummingbirds used in this study were perched in small jars that limited their movement, it may be that the initial fructose utilisation is sufficient for the maintenance of perching metabolism while glucose is reserved for greater or more specific energetic demands. This suggests that glucose uptake capacity is initially downregulated in hummingbirds entering a fast while fructose uptake capacity is unchanged. Alternatively, hummingbird blood fructose may undergo extensive and rapid conversion to glucose. As their muscles lack extensive glycogen stores (Suarez et al., 1990), processes such as gluconeogenesis from fructose in the liver or other tissues may underlie the maintenance of elevated blood glucose.

Control of glucose and fructose flux is well described in avian species. Despite the absence of the insulin–GLUT4 system in avian muscle cells (Dupont, 2009), chickens and English sparrows (*Passer domesticus*) have demonstrated coordinated expression of GLUT isoforms to control sugar transmembrane transport (Sweazea and Braun, 2006; Wagstaff and White, 1995). Hummingbird GLUT expression and regulation are, however, relatively understudied, especially as access to tissue is limited and sample sizes remain relatively small, including in this study. Here, using custom-

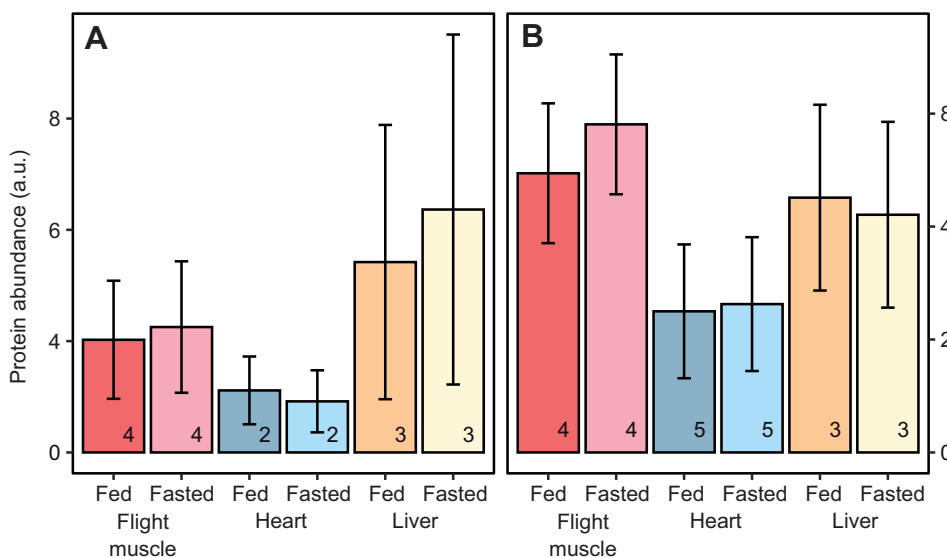

**Fig. 5. Relative protein abundance of GLUT5 in hummingbird flight muscle, heart and liver tissue.** Data represent mean  $\pm$  s.e.m. arbitrary units (a.u.) of intensity based on analyses of normalised immunoblots. *Ad libitum* fed and 1 h fasted hummingbird GLUT5 abundance was measured in (A) whole-tissue homogenates and (B) PM fraction samples. Differences in GLUT5 abundance between fed and fasted conditions within a given tissue are summarised in Tables 1 and 2 (see also Figs S1 and S2). Differences in GLUT5 abundance between tissues within the treatment condition are summarised in Tables 3 and 4. Sample sizes are given in the bars for each tissue and treatment.



designed antibodies, we detected a strong immunoblot signal for the presence of GLUT2, 3 and 5 protein in hummingbird flight muscle, heart and liver tissue in whole-tissue homogenates (Table 1). GLUT2 was observed as a doublet while GLUT3 was detected at a size slightly larger than predicted, both of which may be attributable to variations in glycosylation (Asano et al., 1992; Ohtsubo et al., 2013). GLUT1 protein was detected in hummingbird flight muscle and heart (Table S1). GLUT1 protein in liver whole-tissue homogenates of ruby-throated hummingbirds was only minimally visible (Table 1) and was, surprisingly, not detected in PM fractions (Table 2). This result is in contrast to previously reported detection of hepatic mRNA transcript for GLUT1 in both chickens (Byers et al., 2018) and hummingbirds (Welch et al., 2013). However, as GLUT1 is abundant in erythrocytes (Carruthers, 2009), it is possible that the previous mRNA detection, as well as our detection of some hepatic GLUT1 protein, may have resulted from red blood cell contamination. While the presence of transcript does not necessarily mean that the final protein form is being fully translated (Vogel and Marcotte, 2012), it is clear that hepatic GLUT1 is not translocated to the plasma membrane. Our findings are similar to others that have failed to detect GLUT1 in the avian liver (Byers et al., 2017; Carver et al., 2001), raising the possibility that the role of hepatic GLUT1 protein may be much more reduced among birds than previously appreciated.

In chickens, GLUT protein expression in the PM appears to be dependent on synthesis or degradation of protein (Yamada et al., 1983) rather than the translocation from cytosolic pools that is observed in mammalian cells (Guma et al., 1995). If the same were true in hummingbirds, GLUT abundance of the overall tissue should be tied to the abundance of GLUT protein in the PM. In this study, we noted that flight muscle whole-tissue homogenates showed the greatest response to fasting, in terms of relative GLUT abundance. We detected significantly lower GLUT1, GLUT2 and GLUT3 in flight muscle whole-tissue homogenates of fasted hummingbirds. While GLUTs only contribute to transmembrane transport of sugars when they are expressed in the PM, this reduction of glucose-specific GLUTs across the whole flight muscle tissue may underlie the reduced glucose uptake capacity. This may be especially important in hummingbird flight muscle as its metabolic demands overshadow that of other tissues during hovering (Suarez, 1992). Heart tissue of fasted hummingbirds showed no differences in GLUT abundance compared with that of fed hummingbirds in both whole-tissue homogenate and PM fraction samples. This muted response to fasting was expected as cardiac metabolism relies predominantly on circulating triglycerides (Pascual and Coleman, 2016). This may be especially true of hummingbirds as they routinely switch to fatty acid metabolism during periods of fasting (Welch et al., 2018). Alternatively, it may also imply that the elevated blood glucose concentration in hummingbirds entering a fast provides sufficient substrate for cardiac metabolism, especially given hummingbirds used in this study were constrained to continuously perch during the fasting period. Finally, in both liver whole-tissue homogenates and PM fractions, only GLUT3 was significantly lower in fasted hummingbirds. Chickens have also been shown to decrease their hepatic rate of glucose metabolism when fasted (Goodridge, 1968). Considering that we did not detect GLUT1 protein in liver PM fractions, this reduction in GLUT3 abundance during a fast in the liver might have a large effect on glucose import capacity.

Regardless of the total GLUT abundance of a given tissue, the functional capacity for sugar import into an active cell is dependent on the density of active GLUTs expressed in the PM (Wasserman, 2009). In this study, we detected significantly less GLUT1 protein in the flight muscle PM fractions and GLUT3 protein in liver PM

fractions of fasted hummingbirds. This study is the first to report differences in subcellular abundance of GLUT protein in fed and fasted hummingbirds. Our results suggest that within the first hour of a fast, hummingbirds maintain elevated blood glucose levels through the lowering of glucose-specific glucose transporter abundance in the PM of these tissues. In this case, reduced expression of two high-affinity glucose-specific GLUTs in the PM, GLUT1 ( $K_m \approx 3\text{--}5\text{ mmol l}^{-1}$ ; Zhao and Keating, 2007) and GLUT3 ( $K_m \approx 1.5\text{ mmol l}^{-1}$ ; Mueckler and Thorens, 2013), may substantially impact the import of glucose into flight muscle and liver tissues, respectively. As we observed concordant decreases in GLUT1 in flight muscle and GLUT3 in liver whole-tissue homogenates, our data suggest that hummingbirds, much like chickens, regulate PM GLUT expression via the synthesis or degradation of protein, rather than its translocation alone. Recently, a study measuring levels of chicken GLUT1 mRNA also noticed a decrease in transcript following fasting (Coudert et al., 2018). We further observed that the fructose-transporting GLUT2 (Fig. 3B) and GLUT5 (Fig. 5B) did not change in PM abundance in any tissues tested following the 1 h fast (Table 2). GLUT5 abundance did not change in whole-tissue homogenates either for any tissues. This suggests that GLUT5 and GLUT2 remain constitutively expressed in the PM of hummingbirds entering a fast. As expression of PM GLUTs allows for rapid sugar import (Wasserman, 2009), and as the highest affinity for fructose is exhibited by GLUT5 ( $K_m \approx 11\text{--}12\text{ mmol l}^{-1}$ ; Douard and Ferraris, 2008), this constitutive PM GLUT expression may underlie the observed reduced blood fructose concentration in fasted hummingbirds.

In conclusion, we detected GLUT1, GLUT2, GLUT3 and GLUT5 in all tissues, with the exception of GLUT1 in the liver PM. Flight muscle was observed to respond most dynamically to a 1 h fast, followed by the liver, and finally the heart. We observed a decrease in the abundance of glucose-specific GLUT1 in flight muscle and GLUT3 in the liver in both whole-tissue homogenates and PM fractions. This may lead to reduced glucose import capacity and thus maintenance of elevated blood glucose concentrations in hummingbirds entering a fast. In addition, we observed the constitutive expression of fructose-transporting PM GLUT2 and PM GLUT5 in all tissues, which should permit continued fructose uptake into these tissues during initial stages of fasting, leading to near-depletion of the circulating pool of fructose. We further observed that the changes in GLUT protein expression occur both intracellularly and in the PM – no decrease of GLUT protein in the PM occurred without a concordant decrease in whole-tissue homogenates. These results suggest that hummingbirds, similar to other birds, may rely on mechanisms of GLUT synthesis and degradation, rather than translocation alone, to regulate extreme fluxes in circulating glucose and fructose concentrations.

#### Acknowledgements

We would like to thank Alex Myrka for his lessons on Western blotting and his advice during the entirety of the project. We are also grateful to the Welch Lab volunteers for their assistance with hummingbird capture. We extend a special thanks to Rachael Sparklin and Dr Winston Timp for assembling the ruby-throated hummingbird transcriptome. Finally, we would like to thank Dr Aarthi Ashok, Dr Mauricio Terebiznik and the Welch Lab team for their insights, critiques and support.

#### Competing interests

The authors declare no competing or financial interests.

#### Author contributions

Conceptualization: R.S.A., G.W., K.W.; Methodology: R.S.A., S.M., D.S.; Validation: D.S., G.W.; Formal analysis: R.S.A., L.H., K.W.; Investigation: R.S.A., M.F.D., S.M., D.S.; Data curation: R.S.A., D.S., L.H.; Writing - original draft: R.S.A., D.S.; Writing - review & editing: R.S.A., M.F.D., S.M., D.S., L.H., G.W., K.W.; Supervision: G.W., K.W.; Project administration: K.W.; Funding acquisition: G.W., K.W.

## Funding

This research was supported by grants from the Natural Sciences and Engineering Research Council of Canada (Discovery Grant number 386466) to K.C.W. and the Human Frontier Science Program (number RGP0062/2016) to K.C.W. and G.W.W.

## Data availability

Data are available from the Dryad digital repository (Ali et al., 2020): [dryad.98sf7m0h4](https://doi.org/10.5061/dryad.98sf7m0h4)

## Supplementary information

Supplementary information available online at <https://jeb.biologists.org/lookup/doi/10.1242/jeb.229989.supplemental>

## References

- Ali, R. S., Dick, M. F., Muhammad, S., Sarver, D., Hou, L., Wong, G. W. and Welch, K. C. (2020). Glucose transporter expression and regulation following a fast in the ruby-throated hummingbird, *Archilochus colubris*, v2. Dryad, Dataset. doi:10.5061/dryad.98sf7m0h4
- Asano, T., Katagiri, H., Takata, K., Tsukuda, K., Lin, J. L., Ishihara, H., Inukai, K., Hirano, H., Yazaki, Y. and Oka, Y. (1992). Characterization of GLUT3 protein expressed in Chinese hamster ovary cells. *Biochem. J.* **288**, 189-193. doi:10.1042/bj2880189
- Bates, D., Mächler, M., Bolker, B. and Walker, S. (2015). Fitting linear mixed-effects models using lme4. *J. Stat. Softw.* **67**. doi:10.18637/jss.v067.i01
- Beuchat, C. A. and Chong, C. R. (1998). Hyperglycemia in hummingbirds and its consequences for hemoglobin glycation. *Comp. Biochem. Physiol. A Mol. Integr. Physiol.* **120**, 409-416. doi:10.1016/S1095-6433(98)10039-9
- Beuchat, C. A., Chaplin, S. B. and Morton, M. L. (1979). Ambient Temperature and the Daily Energetics of Two Species of Hummingbirds, *Calypte anna* and *Selasphorus rufus*. *Physiol. Zool.* **52**, 280-295. doi:10.1086/physzool.52.3.30155751
- Boratyn, G. M., Schäffer, A. A., Agarwala, R., Altschul, S. F., Lipman, D. J. and Madden, T. L. (2012). Domain enhanced lookup time accelerated BLAST. *Biol. Direct* **7**, 12. doi:10.1186/1745-6150-7-12
- Byers, M. S., Howard, C. and Wang, X. (2017). Avian and mammalian facilitative glucose transporters. *Microarrays* **6**, 7. doi:10.3390/microarrays6020007
- Byers, M. S., Bohannon-Stewart, A., Khwatenge, C., Alqureish, E., Alhathlol, A., Nahashon, S. and Wang, X. (2018). Absolute quantification of tissue specific expression of glucose transporters in chickens. *J. Mol. Cell. Biol. Forecast* **1**, 8.
- Carruthers, A. (2009). Will the original glucose transporter isoform please stand up! *Am. J. Physiol. Endocrinol. Metabolism* **297**, E836-E848. doi:10.1152/ajpendo.00496.2009
- Carver, F. M., Shibley, J. R., Jr, I. A., Pennington, J. S. Pennington, S. N. (2001). Differential expression of glucose transporters during chick embryogenesis. *Cell. Mol. Life Sci.* **58**, 645-652. doi:10.1007/PL00000887
- Chen, K. K. (1945). Susceptibility of birds to insulin as compared with mammals. *J. Pharmacol. Exp. Ther.* **84**, 74-77.
- Chen, C. C. W. and Welch, K. C. (2014). Hummingbirds can fuel expensive hovering flight completely with either exogenous glucose or fructose. *Funct. Ecol.* **28**, 589-600. doi:10.1111/1365-2435.12202
- Coudert, E., Praud, C., Dupont, J., Crochet, S., Cailleau-Audouin, E., Bordeau, T., Godet, E., Collin, A., Berri, C., Tesseraud, S. et al. (2018). Expression of glucose transporters SLC2A1, SLC2A8, and SLC2A12 in different chicken muscles during ontogenesis. *J. Anim. Sci.* **96**, 498-509. doi:10.1093/jas/skx084
- Dekker, M. J., Su, Q., Baker, C., Rutledge, A. C. and Adeli, K. (2010). Fructose: a highly lipogenic nutrient implicated in insulin resistance, hepatic steatosis, and the metabolic syndrome. *Am. J. Physiol. Endocrinol. Metabolism* **299**, E685-E694. doi:10.1152/ajpendo.00283.2010
- del Rio, M., Baker, H. G. and Baker, I. (1992). Ecological and evolutionary implications of digestive processes: Bird preferences and the sugar constituents of floral nectar and fruit pulp. *Experientia* **48**, 544-551. doi:10.1007/BF01920237
- Dick, M. F., Alcantara-Tanganon, A., Shamli Oghli, Y. and Welch, K. C. (2019). Metabolic partitioning of sucrose and seasonal changes in fat turnover rate in ruby-throated hummingbirds (*Archilochus colubris*). *J. Exp. Biol.* **223**, jeb212696. doi:10.1242/jeb.212696
- Douard, V. and Ferraris, R. P. (2008). Regulation of the fructose transporter GLUT5 in health and disease. *Am. J. Physiol. Endocrinol. Metabolism* **295**, E227-E237. doi:10.1152/ajpendo.90245.2008
- Dupont, J. (2009). Insulin signaling in chicken liver and muscle. *Gen. Comp. Endocrinol.* **163**, 52-57. doi:10.1016/j.ygcen.2008.10.016
- Eberts, E., Dick, M. and Welch, K. (2019). Metabolic fates of evening crop-stored sugar in ruby-throated hummingbirds (*Archilochus colubris*). *Diversity* **11**, 9. doi:10.3390/d11010009
- Egert, S., Nguyen, N. and Schwaiger, M. (1999). Myocardial Glucose Transporter GLUT1: Translocation Induced by Insulin and Ischemia. *J. Mol. Cell. Cardiol.* **31**, 1337-1344. doi:10.1006/jmcc.1999.0965
- Gassmann, M., Grenacher, B., Rohde, B. and Vogel, J. (2009). Quantifying Western blots: Pitfalls of densitometry. *Electrophoresis* **30**, 1845-1855. doi:10.1002/elps.200800720
- Gasteiger, E., Hoogland, C., Gattiker, A., Duvaud, S., Wilkins, M. R., Appel, R. D. and Bairoch, A. (2005). Protein identification and analysis tools on the EXPASY server. In *The Proteomics Protocols Handbook* (ed. J. M. Walker), pp. 571-607. Totowa, NJ: Humana Press.
- Godoy, A., Ulloa, V., Rodríguez, F., Reinicke, K., Yañez, A. J., García, M. de los A., Medina, R. A., Carrasco, M., Barberis, S., Castro, T. et al. (2006). Differential subcellular distribution of glucose transporters GLUT1-6 and GLUT9 in human cancer: Ultrastructural localization of GLUT1 and GLUT5 in breast tumor tissues. *J. Cell. Physiol.* **207**, 614-627. doi:10.1002/jcp.20606
- Goodridge, A. G. (1968). The effect of starvation and starvation followed by feeding on enzyme activity and the metabolism of [U-14C]glucose in liver from growing chicks. *Biochem. J.* **108**, 667-673. doi:10.1042/bj1080667
- Guma, A., Zierath, J. R., Wallberg-Henriksson, H. and Klip, A. (1995). Insulin induces translocation of GLUT-4 glucose transporters in human skeletal muscle. *Am. J. Physiol. Endocrinol. Metabolism* **268**, E613-E622. doi:10.1152/ajpendo.1995.268.4.E613
- Han, J., Gagnon, S., Eckle, T. and Borchers, C. H. (2013). Metabolomic analysis of key central carbon metabolism carboxylic acids as their 3-nitrophenylhydrazones by UPLC/ESI-MS: General. *Electrophoresis* **34**, 2891-2900. doi:10.1002/elps.201200601
- Han, J., Lin, K., Sequira, C., Yang, J. and Borchers, C. H. (2016). Quantitation of low molecular weight sugars by chemical derivatization-liquid chromatography/multiple reaction monitoring/mass spectrometry: liquid phase separations. *Electrophoresis* **37**, 1851-1860. doi:10.1002/elps.201600150
- Honda, K., Kamisoyama, H., Uemura, T., Yanagi, T., Saito, N., Kurose, Y., Sugahara, K., Katoh, K. and Hasegawa, S. (2012). The mechanism underlying the central glucagon-induced hyperglycemia and anorexia in chicks. *Comp. Biochem. Physiol. A: Mol. Integr. Physiol.* **163**, 260-264. doi:10.1016/j.cbpa.2012.08.005
- Hussar, P., Järveots, T. and Dürütis, I. (2019). Immunolocalization of hexose transporters in ostriches' intestinal epithelial cells during their first postnatal week. *PoA* **28**, 61-67. doi:10.12697/poa.2019.28.1.05
- Karasov, W. H. (2017). Integrative physiology of transcellular and paracellular intestinal absorption. *J. Exp. Biol.* **220**, 2495-2501. doi:10.1242/jeb.144048
- Keegan, D. J. (1977). Aspects of the assimilation of sugars by *Rousettus aegyptiacus*. *Comp. Biochem. Physiol. A Physiol.* **58**, 349-352. doi:10.1016/0300-9629(77)90153-0
- Klip, A., Volchuk, A., He, L. and Tsakiridis, T. (1996). The glucose transporters of skeletal muscle. *Semin. Cell Dev. Biol.* **7**, 229-237. doi:10.1006/scdb.1996.0031
- Mathieu-Costello, O., Suarez, R. and Hochachka, P. W. (1992). Capillary-to-fiber geometry and mitochondrial density in hummingbird flight muscle. *Respiration* **59**, 113-132. doi:10.1016/0034-5687(92)90075-8
- McWhorter, T. J. and Martínez del Rio, C. (2000). Does gut function limit hummingbird food intake? *Physiol. Biochem. Zool.* **73**, 313-324. doi:10.1086/316753
- Mueckler, M. and Thorens, B. (2013). The SLC2 (GLUT) family of membrane transporters. *Mol. Asp. Med.* **34**, 121-138. doi:10.1016/j.mam.2012.07.001
- Myrka, A. M. and Welch, K. C. (2018). Evidence of high transport and phosphorylation capacity for both glucose and fructose in the ruby-throated hummingbird (*Archilochus colubris*). *Comp. Biochem. Physiol. B Biochem. Mol. Biology* **224**, 253-261. doi:10.1016/j.cbpb.2017.10.003
- Ohtsubo, K., Takamatsu, S., Gao, C., Korekane, H., Kurosawa, T. M. and Taniguchi, N. (2013). N-glycosylation modulates the membrane sub-domain distribution and activity of glucose transporter 2 in pancreatic beta cells. *Biochem. Biophys. Res. Commun.* **434**, 346-351. doi:10.1016/j.bbrc.2013.03.076
- Pascual, F. and Coleman, R. A. (2016). Fuel availability and fate in cardiac metabolism: a tale of two substrates. *Biochim. Biophys. Acta* **1861**, 1425-1433. doi:10.1016/j.bbali.2016.03.014
- Price, E. R., Brun, A., Caviedes-Vidal, E. and Karasov, W. H. (2015). Digestive adaptations of aerial lifestyles. *Physiology* **30**, 69-78. doi:10.1152/physiol.00020.2014
- Rehkämper, G., Schuchmann, K.-L., Schleicher, A. and Zilles, K. (1991). Encephalization in Hummingbirds (Trochilidae). *Brain Behav. Evol.* **37**, 85-91. doi:10.1159/000114349
- Rodríguez-Peña, N., Price, E. R., Caviedes-Vidal, E., Flores-Ortiz, C. M. and Karasov, W. H. (2016). Intestinal paracellular absorption is necessary to support the sugar oxidation cascade in nectarivorous bats. *J. Exp. Biol.* **219**, 779-782. doi:10.1242/jeb.133462
- Simpson, I. A., Dwyer, D., Malide, D., Moley, K. H., Travis, A. and Vannucci, S. J. (2008). The facilitative glucose transporter GLUT3: 20 years of distinction. *Am. J. Physiol. Endocrinol. Metabolism* **295**, E242-E253. doi:10.1152/ajpendo.90388.2008
- Steane, S. E., Mylott, D. and White, M. K. (1998). Regulation of a heterologous glucose transporter promoter in chicken embryo fibroblasts. *Biochem. Biophys. Res. Commun.* **252**, 318-323. doi:10.1006/bbrc.1998.9616
- Suarez, R. (1992). Hummingbird flight: Sustaining the highest mass-specific metabolic rates among vertebrates. *Experientia* **48**, 565-570. doi:10.1007/BF01920240
- Suarez, R. and Welch, K. C. (2011). The sugar oxidation cascade: aerial refueling in hummingbirds and nectar bats. *J. Exp. Biol.* **214**, 172-178. doi:10.1242/jeb.047936

- Suarez, R. and Welch, K.** (2017). Sugar metabolism in hummingbirds and nectar bats. *Nutrients* **9**, 743. doi:10.3390/nu9070743
- Suarez, R., Brownsey, R. W., Vogl, W., Brown, G. S. and Hochachka, P. W.** (1988). Biosynthetic capacity of hummingbird liver. *Am. J. Physiol.* **255**, R699-R702. doi:10.1152/ajpregu.1988.255.5.R699
- Suarez, R., Lighton, J. R., Moyes, C. D., Brown, G. S., Gass, C. L. and Hochachka, P. W.** (1990). Fuel selection in rufous hummingbirds: ecological implications of metabolic biochemistry. *Proc. Natl Acad. Sci. USA* **87**, 9207-9210. doi:10.1073/pnas.87.23.9207
- Sweazea, K. L. and Braun, E. J.** (2006). Glucose transporter expression in English sparrows (*Passer domesticus*). *Comp. Biochem. Physiol. B Biochem. Mol. Biol.* **144**, 263-270. doi:10.1016/j.cbpb.2005.12.027
- Thorens, B. and Mueckler, M.** (2010). Glucose transporters in the 21st Century. *Am. J. Physiol. Endocrinol. Metabolism* **298**, E141-E145. doi:10.1152/ajpendo.00712.2009
- Tokushima, Y., Takahashi, K., Sato, K. and Akiba, Y.** (2005). Glucose uptake in vivo in skeletal muscles of insulin-injected chicks. *Comp. Biochem. Physiol. B Biochem. Mol. Biol.* **141**, 43-48. doi:10.1016/j.cbpc.2005.01.008
- Vogel, C. and Marcotte, E. M.** (2012). Insights into the regulation of protein abundance from proteomic and transcriptomic analyses. *Nat. Rev. Genet.* **13**, 227-232. doi:10.1038/nrg3185
- Voigt, C. C. and Speakman, J. R.** (2007). Nectar-feeding bats fuel their high metabolism directly with exogenous carbohydrates. *Funct Ecology* **21**, 913-921. doi:10.1111/j.1365-2435.2007.01321.x
- Wagstaff, P. and White, M. K.** (1995). Characterization of the avian GLUT1 glucose transporter: differential regulation of GLUT1 and GLUT3 in chicken embryo fibroblasts. *Mol. Biol. Cell* **6**, 15. doi:10.1091/mbc.6.11.1575
- Wasserman, D. H.** (2009). Four grams of glucose. *Am. J. Physiol. Endocrinol. Metabolism* **296**, E11-E21. doi:10.1152/ajpendo.90563.2008
- Wasserman, D. H., Kang, L., Ayala, J. E., Fueger, P. T. and Lee-Young, R. S.** (2011). The physiological regulation of glucose flux into muscle in vivo. *J. Exp. Biol.* **214**, 254-262. doi:10.1242/jeb.048041
- Welch, K. C., Allalou, A., Sehgal, P., Cheng, J. and Ashok, A.** (2013). Glucose transporter expression in an avian nectarivore: the ruby-throated hummingbird (*Archilochus colubris*). *PLoS ONE* **8**, e77003. doi:10.1371/journal.pone.0077003
- Welch, K. C., Myrka, A. M., Ali, R. S. and Dick, M. F.** (2018). The metabolic flexibility of hovering vertebrate nectarivores. *Physiology* **33**, 127-137. doi:10.1152/physiol.00001.2018
- Wood, I. S. and Trayhurn, P.** (2003). Glucose transporters (GLUT and SGLT): expanded families of sugar transport proteins. *Br. J. Nutr.* **89**, 3. doi:10.1079/BJN2002763
- Workman, R. E., Myrka, A. M., Wong, G. W., Tseng, E., Welch, K. C. and Timp, W.** (2018). Single-molecule, full-length transcript sequencing provides insight into the extreme metabolism of the ruby-throated hummingbird *Archilochus colubris*. *GigaScience* **7**, 1-12. doi:10.1093/gigascience/giy009
- Yamada, K., Tillotson, L. G. and Isselbacher, K. J.** (1983). Regulation of hexose carriers in chicken embryo fibroblasts. *J. Biol. Chem.* **258**, 9786-9792.
- Yamamoto, N., Yamashita, Y., Yoshioka, Y., Nishiumi, S. and Ashida, H.** (2016). Rapid preparation of a plasma membrane fraction: western blot detection of translocated glucose transporter 4 from plasma membrane of muscle and adipose cells and tissues. *Curr Protoc Protein Sci.* **85**, 1-29. doi:10.1002/cpps.13
- Yang, J. and Holman, G. D.** (1993). Comparison of GLUT4 and GLUT 1 subcellular trafficking in basal and insulin-stimulated 3T3-L1 cells. *J. Biol. Chem.* **268**, 4600-4603.
- Zhang, W., Summers, L. H., Siegel, P. B., Cline, M. A. and Gilbert, E. R.** (2013). Quantity of glucose transporter and appetite-associated factor mRNA in various tissues after insulin injection in chickens selected for low or high body weight. *Physiol. Genomics* **45**, 1084-1094. doi:10.1152/physiolgenomics.00102.2013
- Zhao, F.-Q. and Keating, A. F.** (2007). Functional properties and genomics of glucose transporters. *Curr. Genomics* **8**, 113-128. doi:10.2174/138920207780368187
- Zhao, F. Q., Glimm, D. R. and Kennelly, J. J.** (1993). Distribution of mammalian facilitative glucose transporter messenger RNA in bovine tissues. *Int. J. Biochem.* **25**, 1897-1903. doi:10.1016/0020-711X(88)90322-9
